# Supplementary material for: Role of Knee and Ankle Extensors’ Muscle-Tendon Properties in Dynamic Balance Recovery from a Simulated Slip
Source: MDPI journal article supplement (doi:10.3390/s22093483), 2022-05-03
Supplement: s1 [file s1]

Supplementary material: Role of knee and ankle extensors' muscle-tendon properties in dynamic balance recovery from a simulated slip.

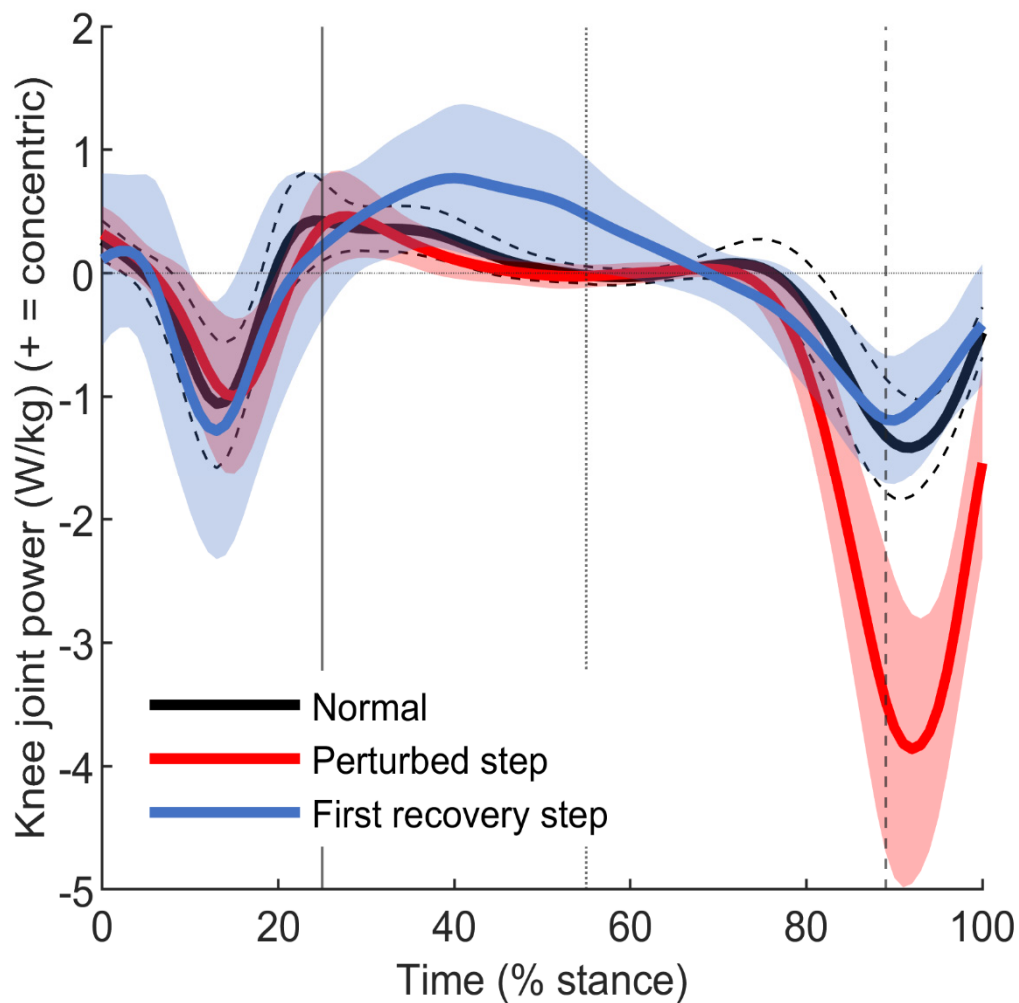

**Figure S1.** Knee joint power over the stance phase collected during normal gait (average of all participants thick black line  $\pm$  1SD dashed lines), the perturbed step (average of all participants thick red line  $\pm$  1SD shaded area) and the first recovery step (average of all participants thick blue line  $\pm$  1SD shaded area). The vertical black line at 25% stance represents the beginning of the belt acceleration, the dotted vertical black line at 55% stance represents the time of peak belt speed, the dashed vertical black line at 89% stance represents the time of peak knee moment during propulsion of the perturbed stance.

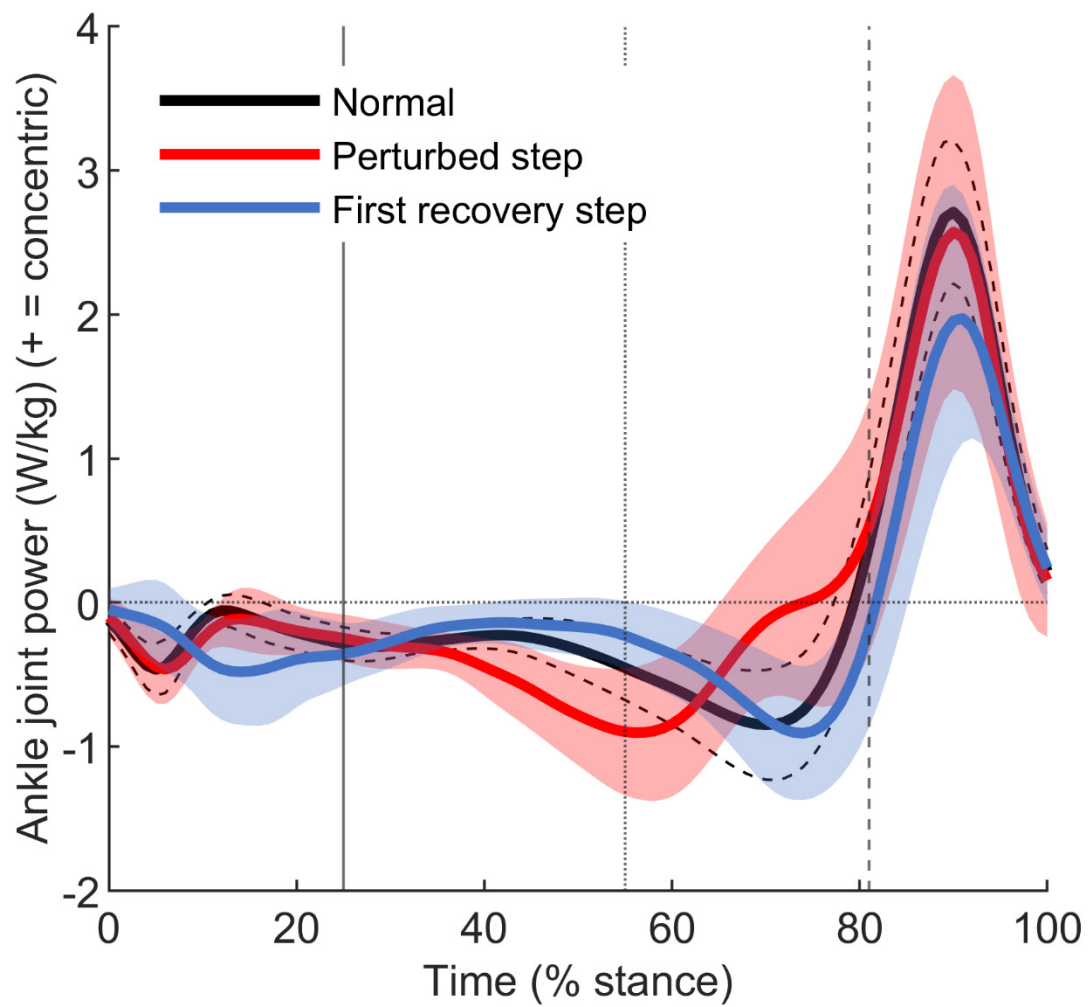

**Figure S2.** Ankle joint power over the stance phase collected during normal gait (average of all participants thick black line  $\pm$  1SD dashed lines), the perturbed step (average of all participants thick red line  $\pm$  1SD shaded area) and the first recovery step (average of all participants thick blue line  $\pm$  1SD shaded area). The vertical black line at 25% stance represents the beginning of the belt acceleration, the dotted vertical black line at 55% stance represents the time of peak belt speed, the dashed vertical black line at 81% stance represents the time of peak ankle moment during propulsion of the perturbed stance.

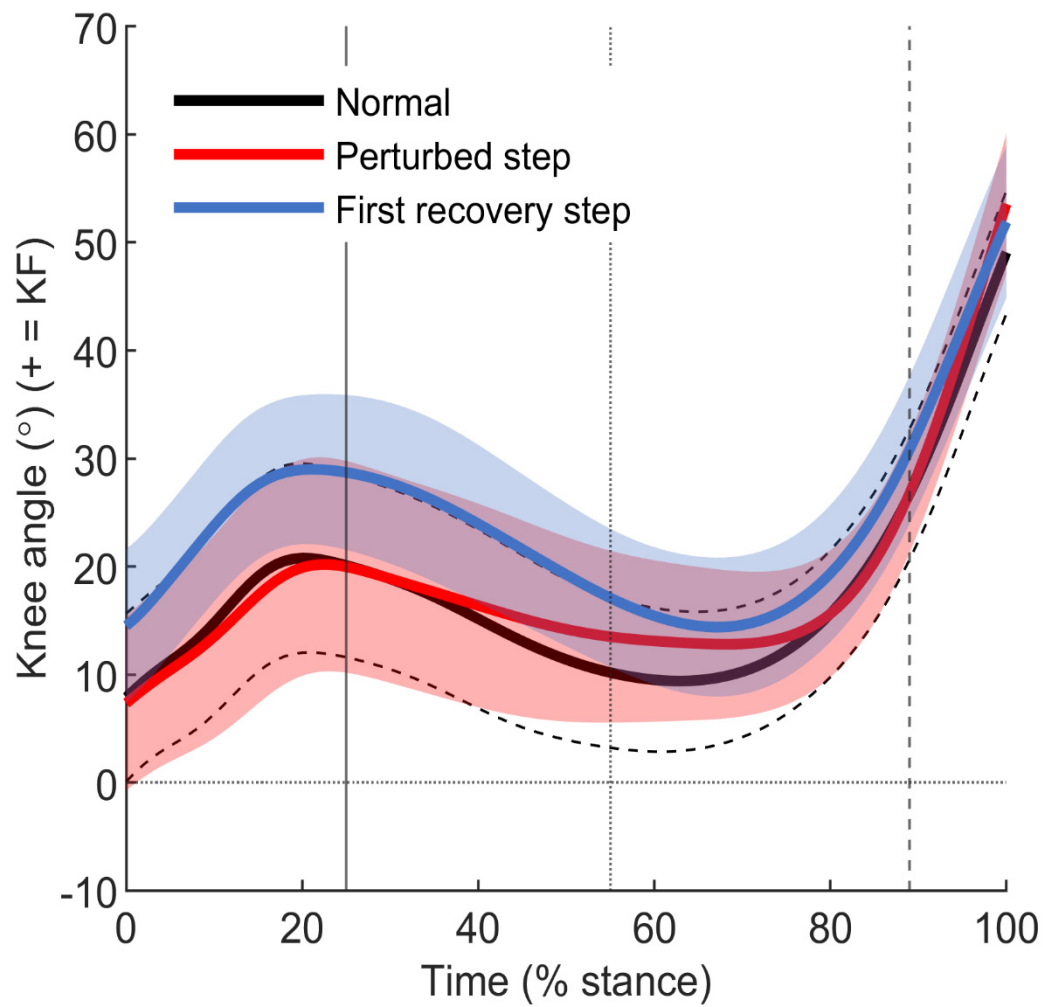

**Figure S3.** Knee angle over the stance phase collected during normal gait (average of all participants thick black line  $\pm$  1SD dashed lines), the perturbed step (average of all participants thick red line  $\pm$  1SD shaded area) and the first recovery step (average of all participants thick blue line  $\pm$  1SD shaded area). The vertical black line at 25% stance represents the beginning of the belt acceleration, the dotted vertical black line at 55% stance represents the time of peak belt speed, the dashed vertical black line at 89% stance represents the time of peak knee moment during propulsion of the perturbed stance.

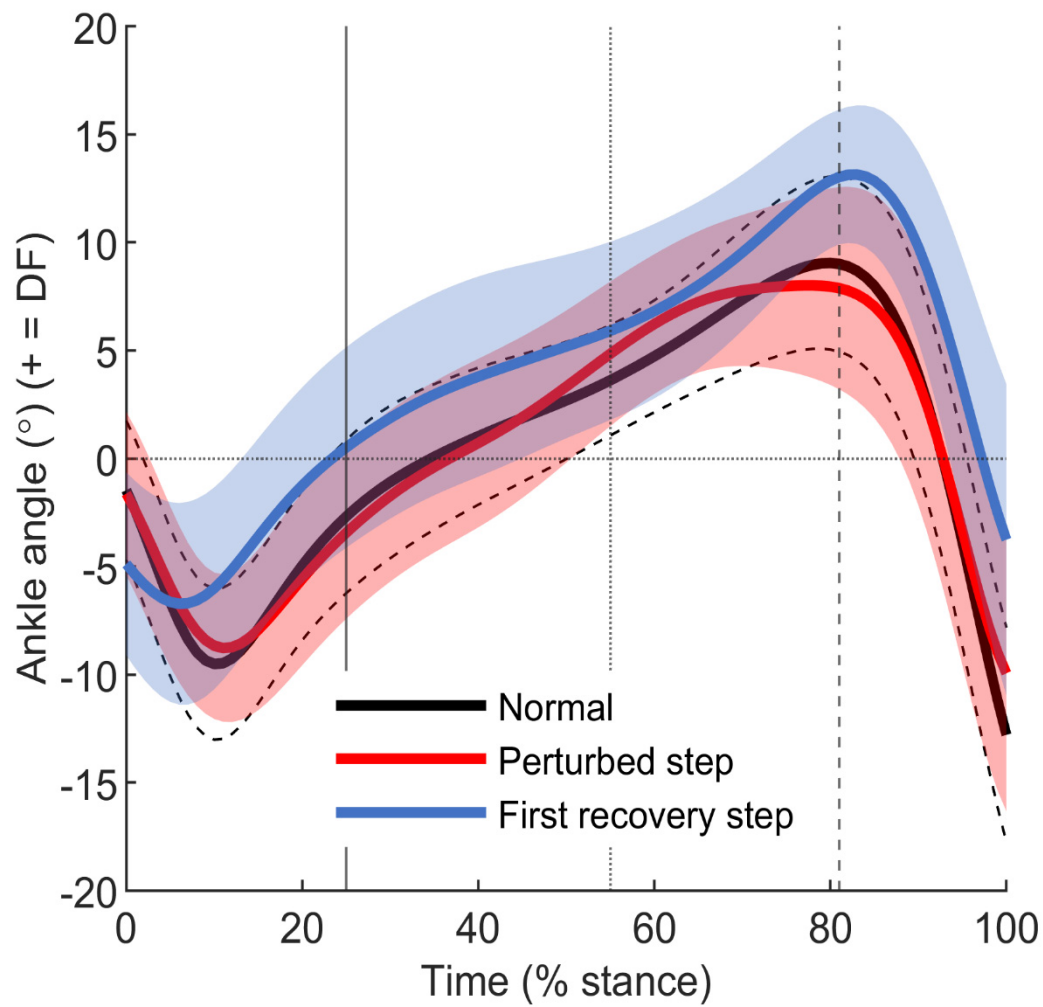

**Figure S4.** Ankle angle over the stance phase collected during normal gait (average of all participants thick black line  $\pm$  1SD dashed lines), the perturbed step (average of all participants thick red line  $\pm$  1SD shaded area) and the first recovery step (average of all participants thick blue line  $\pm$  1SD shaded area). The vertical black line at 25% stance represents the beginning of the belt acceleration, the dotted vertical black line at 55% stance represents the time of peak belt speed, the dashed vertical black line at 81% stance represents the time of peak ankle moment during propulsion of the perturbed stance.

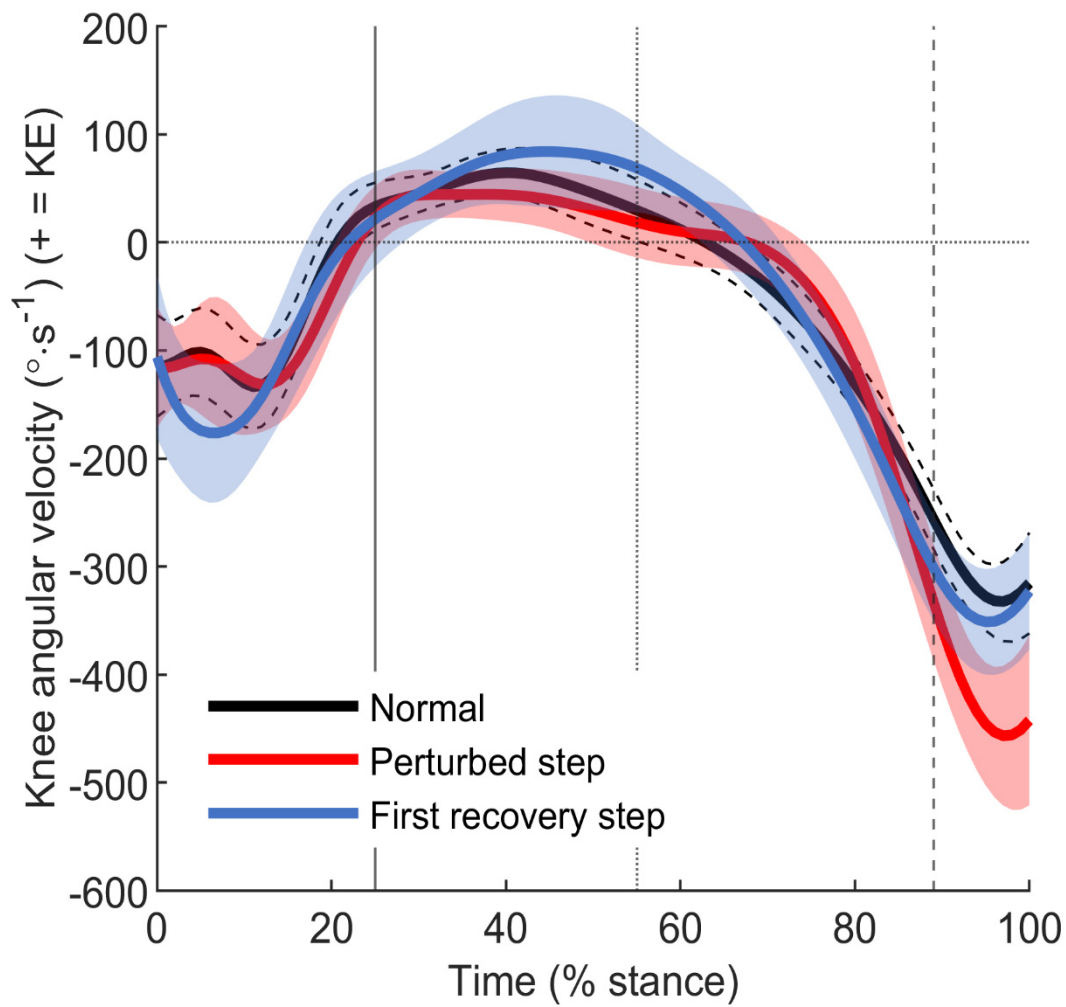

**Figure S5.** Knee angular velocity over the stance phase collected during normal gait (average of all participants thick black line  $\pm$  1SD dashed lines), the perturbed step (average of all participants thick red line  $\pm$  1SD shaded area) and the first recovery step (average of all participants thick blue line  $\pm$  1SD shaded area). The vertical black line at 25% stance represents the beginning of the belt acceleration, the dotted vertical black line at 55% stance represents the time of peak belt speed, the dashed vertical black line at 89% stance represents the time of peak knee moment during propulsion of the perturbed stance.

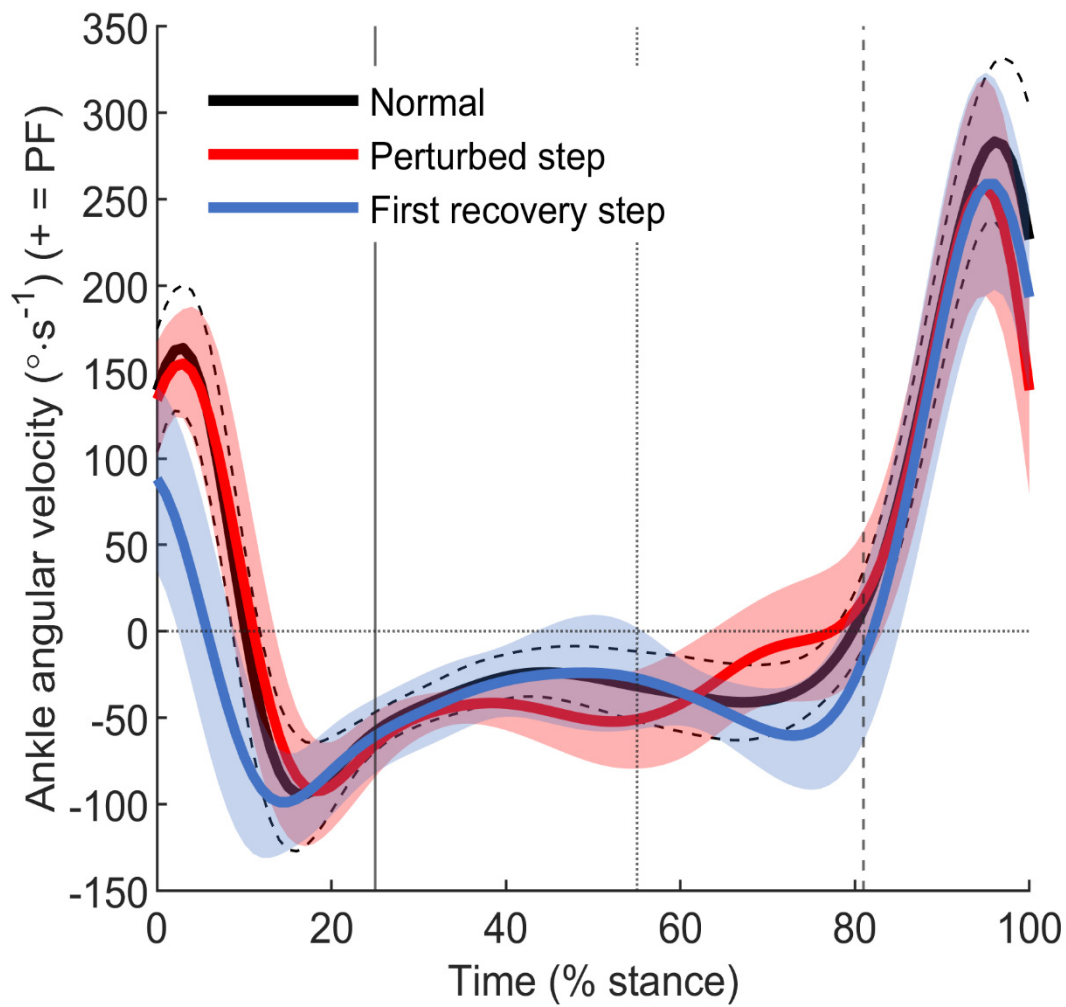

**Figure S6.** Ankle angular velocity over the stance phase collected during normal gait (average of all participants thick black line  $\pm$  1SD dashed lines), the perturbed step (average of all participants thick red line  $\pm$  1SD shaded area) and the first recovery step (average of all participants thick blue line  $\pm$  1SD shaded area). The vertical black line at 25% stance represents the beginning of the belt acceleration, the dotted vertical black line at 55% stance represents the time of peak belt speed, the dashed vertical black line at 81% stance represents the time of peak ankle moment during propulsion of the perturbed stance.
